# Supplementary material for: DLP-printed GelMA-PMAA scaffold for bone regeneration through endochondral ossification
Source: PubMed Central journal article supplement — Int J Bioprint. 2023 Mar 16;9(5):754. doi: 10.18063/ijb.754 (PMC10339440; doi:10.18063/ijb.754), 2023-03-16
Supplement: IJB-9-5-754-s001.pdf [file IJB-9-5-754-s001.pdf]

RESEARCH ARTICLE

# DLP-printed GelMA-PMAA scaffold for bone regeneration through endochondral ossification

## Supplementary File

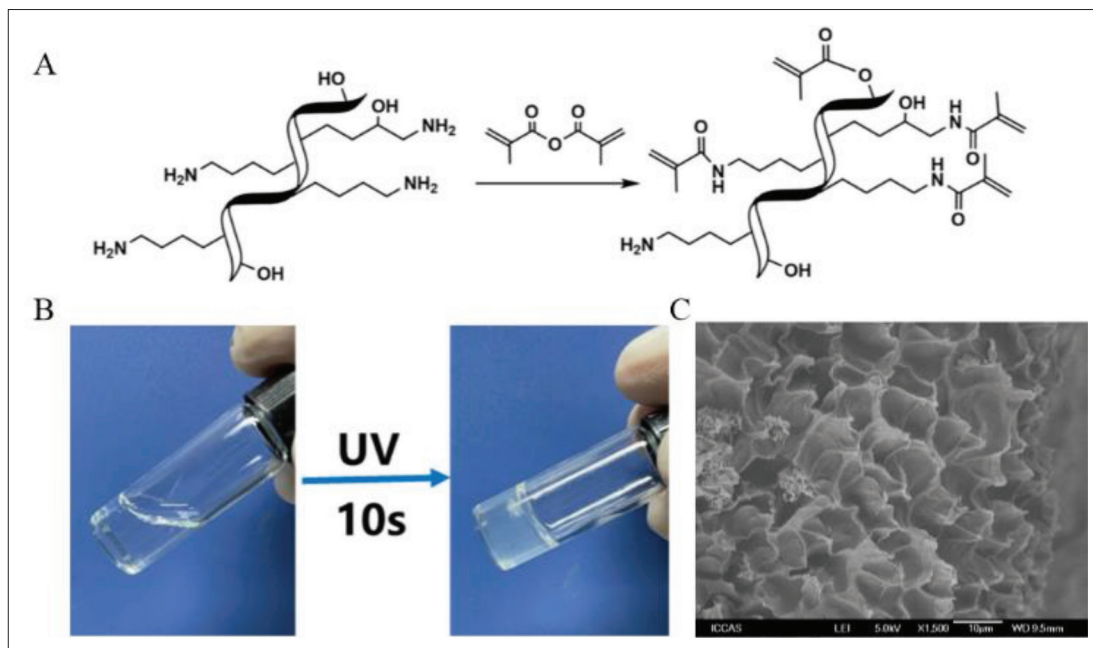

**Figure S1.** Characterization of GelMA. (A) The reaction diagram of the synthesis of GelMA, which is the basic material for the subsequent 3D printing process. (B) Liquid-to-solid transition after 10-s exposure to UV. (C) Microporous structure of GelMA using SEM.

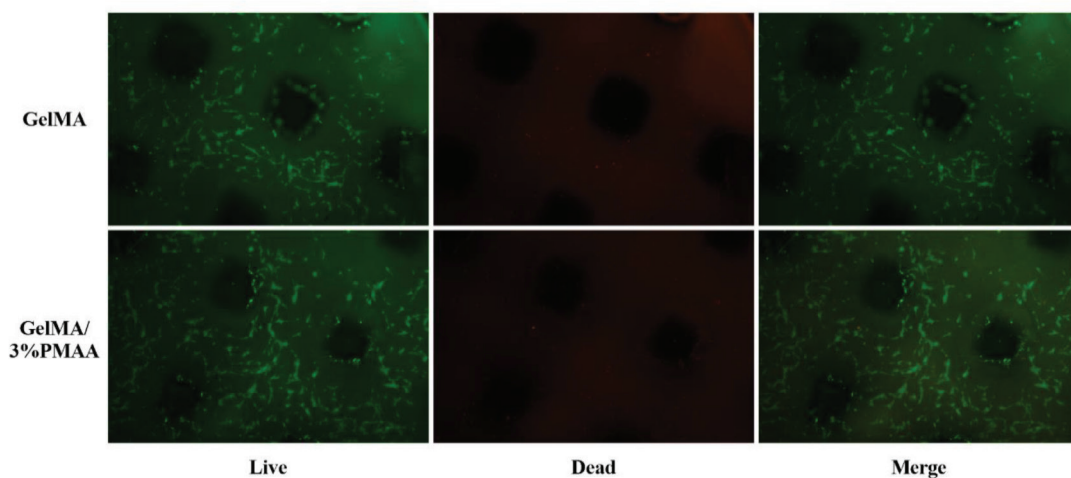

Figure S2. High viability of cells after 24-h inoculation on the scaffold surface.

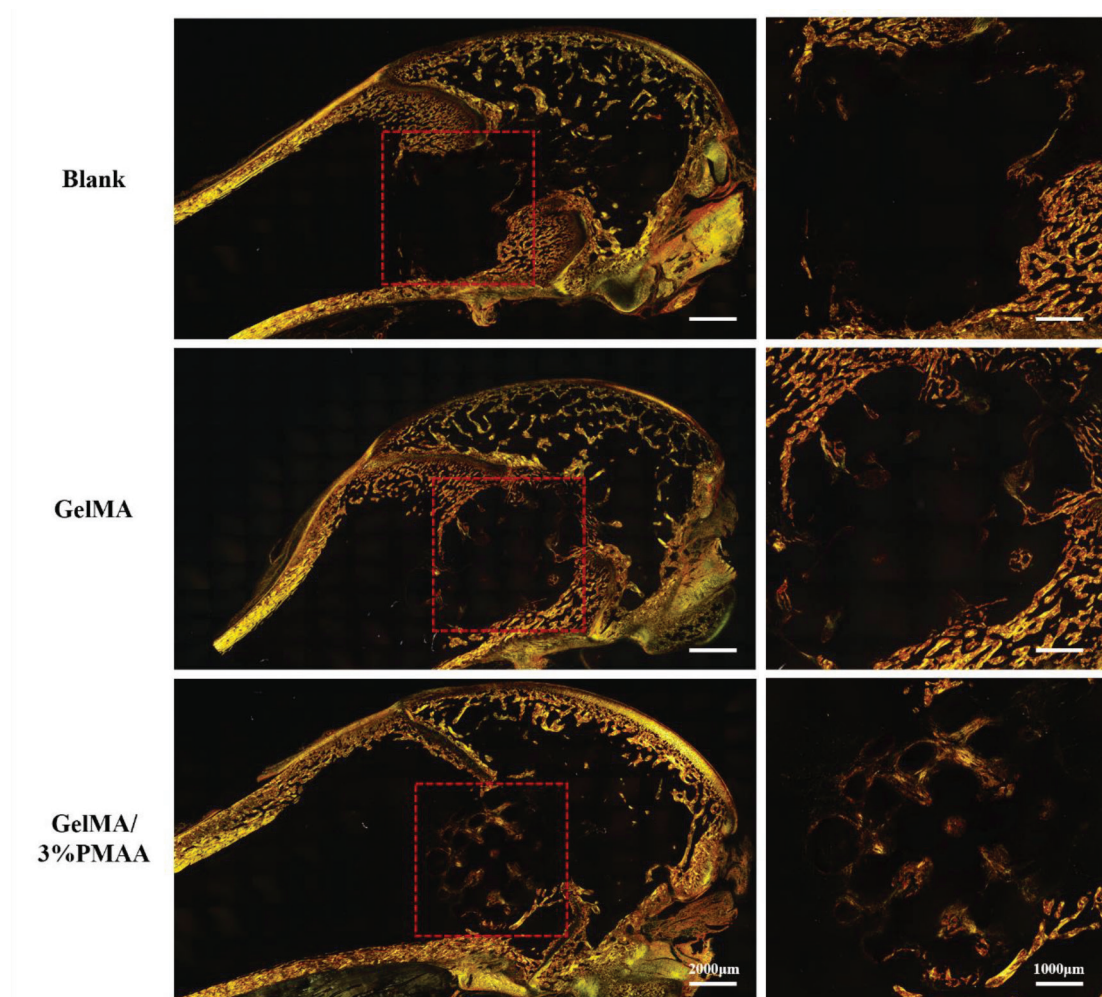

Figure S3. Sirius red staining of the defect site at week 4. More new bone could be observed in the GelMA/3% PMAA scaffold compared to the GelMA scaffold, while the new bone showed a reticular structure similar to that of the scaffold.
